# Supplementary material for: Three novel ANO5 missense mutations in Caucasian and Chinese families and sporadic cases with gnathodiaphyseal dysplasia
Source: PubMed Central journal article supplement (PMC5296836; doi:10.1038/srep40935), 2017-02-08
Supplement: srep40935-s1.pdf [file srep40935-s1.pdf]

## Three novel *ANO5* missense mutations in Caucasian and Chinese families and sporadic cases with gnathodiaphyseal dysplasia

Lingling Jin<sup>1</sup>, Yi Liu<sup>2</sup>, Fanyue Sun<sup>3</sup>, Michael T. Collins<sup>4</sup>, Keith Blackwell<sup>5</sup>, Albert S. Woo<sup>6</sup>, Ernst J. Reichenberger<sup>3\*</sup>, Ying Hu<sup>1\*</sup>

**Supplemental Table 1.** Oligonucleotides used to sequence the *ANO5* gene.

**Supplemental Table 2.** Amplification primers for quantitative real-time PCR.

Table 1. Oligonucleotides used to sequence the *ANO5* gene

| Exon | Forward(5'-3')             | Reverse(5'-3')            |
|------|----------------------------|---------------------------|
| 1    | AAAGAGGCGTGAAACAGG         | AGCGAACCTCCCTAGGACTC      |
| 2    | TGCTTTTCCTGTTATAGGCAGTT    | GGGAGCCTCAAACAATCA        |
| 3    | CCCACAGGCACATTTACAGA       | GCATGTCAAATAACTGAACTGGA   |
| 4    | TTGCTTTCTCCCATTTTTCT       | ACAATGTTCCCCCAAATCAA      |
| 5    | TCTTCCTCCTGAGTCATTATTGC    | CACTTCAGGGCCTCTCACTT      |
| 6    | GCAGAGAGCCATCCAGAGTC       | ACCACAGGCCCTATCATCC       |
| 7    | TTGAAAATGCTTTGATGTGTTTG    | CACCTTGAGAAATGGTACG       |
| 8    | TTCCTGACAACCAAGAGAAGC      | GGATTTCCACCATGAGAG        |
| 9    | TTGCATTTTGAGATAGCTTTGTG    | TCAGTTTAGCAACAACATTCTCC   |
| 10   | AGAAAGCAGTGGAGCCAAAA       | ACCAGGTGAGAGGCAACTGT      |
| 11   | AAAGCTGGGCTCTGAAAACCTC     | ACCCCAAATTCCCATGAATA      |
| 12   | TGTTCCCTCTGCAGCACTGA       | TGGCCACTAATATGCACTCC      |
| 13   | AGCCACCTGAAACATGTGAA       | TTGCAGAATATTTTAAAGGCAAAA  |
| 14   | GGCCTGGAGATTTCTCCTTC       | GGGAGAGGGAAAGGAAAGAC      |
| 15   | TGCCAGTGTTTCATGTCTTGC      | CTCCTGGAGACCTGATCCAA      |
| 16   | TCCTAGGCTTTTCCAGTGGTT      | TGAATCAGTGCTTGACACACA     |
| 17   | AACCTTCCAACCAAAACCT        | AAACCTTGCTAGCCATGGAA      |
| 18   | GCTTTGGCTGGTGTCAATTC       | TGGAACAGGGAAATAGGGAAC     |
| 19   | TGTGGATCACTCCAAAACGA       | AAGAGTTTGCATGACATAGGTTTTT |
| 20   | TGTTTCAGGACAAAGACTTGC      | TCTGAATCATGCAATGTGTGAA    |
| 21   | TTTTTCTGATCAACTAGAAAGGTCTG | TTTCCTTTCTTTTCTGTCCAC     |
| 22   | TCTTCCTTGCCTTTCTACCTCA     | CCCAAGGCCAGTGTTTCTTA      |

Table 2. Amplification primers for quantitative real-time PCR

| Gene    | Forward(5'-3')        | Reverse(5'-3')          |
|---------|-----------------------|-------------------------|
| Ocn     | CTCACAGATGCCAAGCCCA   | CCAAGGTAGCGCCGGAGT      |
| Col1a1  | TTCTCCTGGTAAAGATGGTGC | GGACCAGCATCACCTTTAACA   |
| Runx2   | GGCAAGATGAGCGACGTGAG  | ATCTGACTCTGTCCTTGTGG    |
| Osterix | CTGGCTAGGTGGTGGTCAG   | GTAGGGAGCTGGGTTAAGG     |
| Ano5    | CATGGGAATCCGAGTGGATG  | GTGGAATTCGTTGAGTAGGC    |
| Gapdh   | AGGTCGGTGTGAACGGATTTG | TGTAGACCATGTAGTTGAGGTCA |
